# Supplementary material for: Construction of a unique 2-D layered vanadoborate with water-assisted proton conductivity
Source: Royal Society of Chemistry journal article supplement (doi:10.1039/d2nj03124h), 2022-01-01
Supplement: d2nj03124h9.pdf [file d2nj03124h9.pdf]

## Electronic Supplementary Information

### Construction of a unique 2-D layered vanadoborate with water-assisted proton conductivity

Xinxin Liu<sup>a</sup>, Biao Guo<sup>a\*</sup>, Le Zhang<sup>b</sup>, Sisi Zhao<sup>a</sup>, Yuwei Dong<sup>a</sup> and Zhen Zhao<sup>a\*</sup>

<sup>a</sup> Institute of Catalysis for Energy and Environment, College of Chemistry and Chemical Engineering, Shenyang Normal University, Shenyang 110034, China.

<sup>b</sup> School of Pharmacy, Xinxiang University, Xinxiang 453000, P. R. China

\*Corresponding author: [biaoguo14@126.com](mailto:biaoguo14@126.com); [zhenzhao@cup.edu.cn](mailto:zhenzhao@cup.edu.cn)

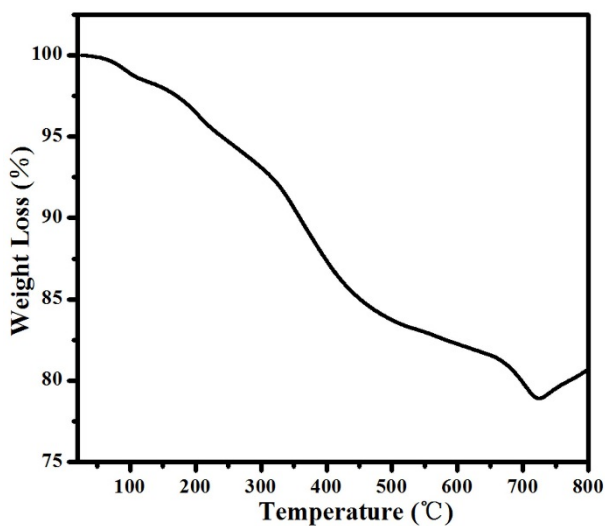

Fig. S1. TG curve of 1 in air.

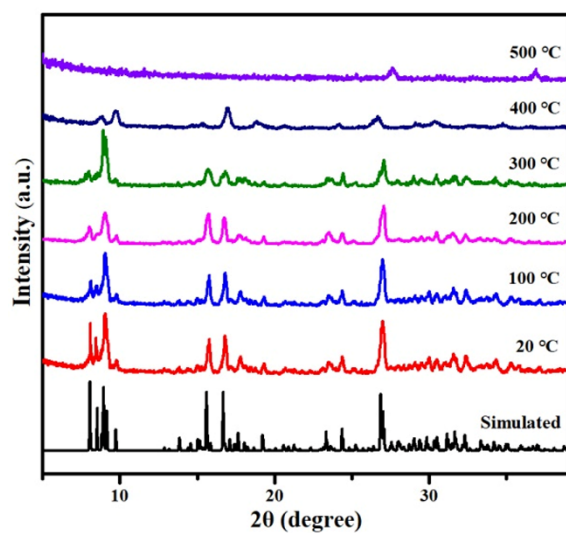

Fig. S2. In-situ PXRD patterns collected in air from 20 °C to 500 °C

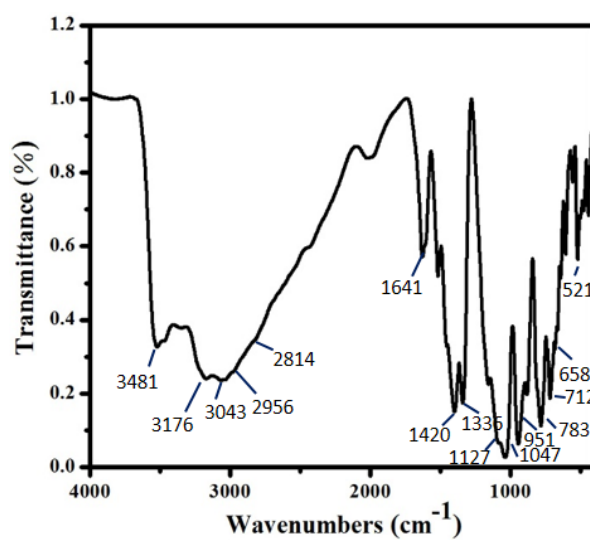

Fig. S3. The FT-IR spectra of 1

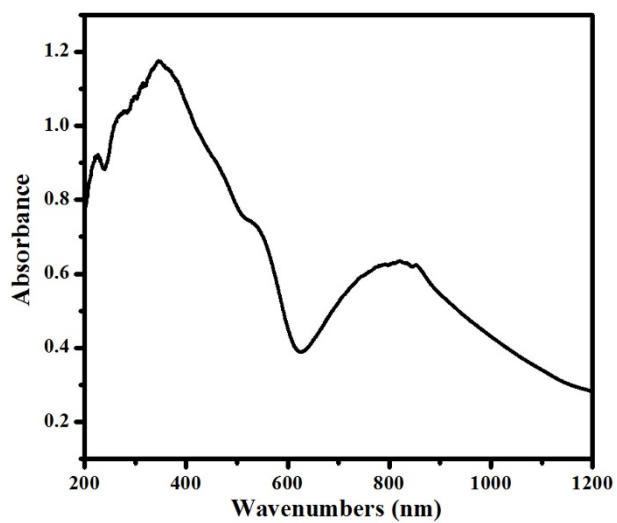

Fig. S4. UV-vis spectrum of 1.

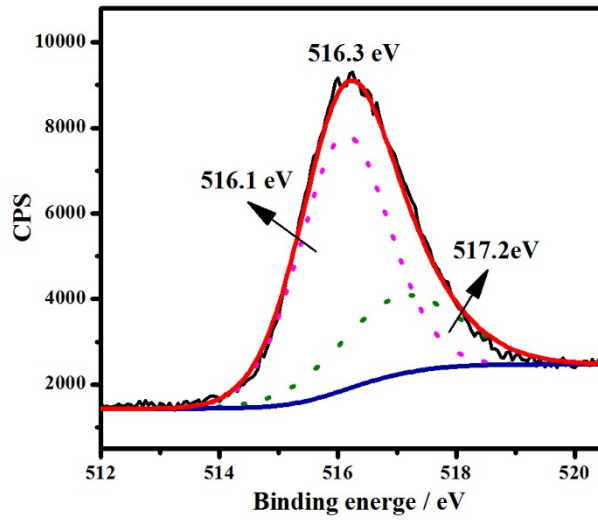

Fig. S5. XPS spectrum of vanadium in 1

The peak at 516.1 eV is attributed to  $V^{4+}$  and a shoulder at about 517.2 eV is assigned to for  $V^{5+}$ .

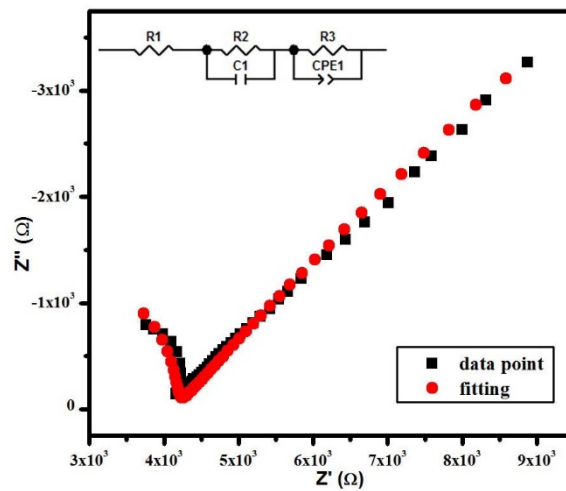

Fig. S6. Equivalent circuits used to fit the impedance data.

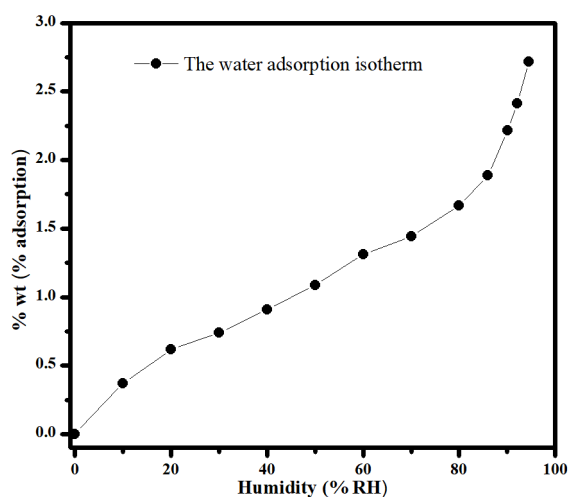

**Fig. S7.** The water adsorption isotherm of **1** at 293 K.

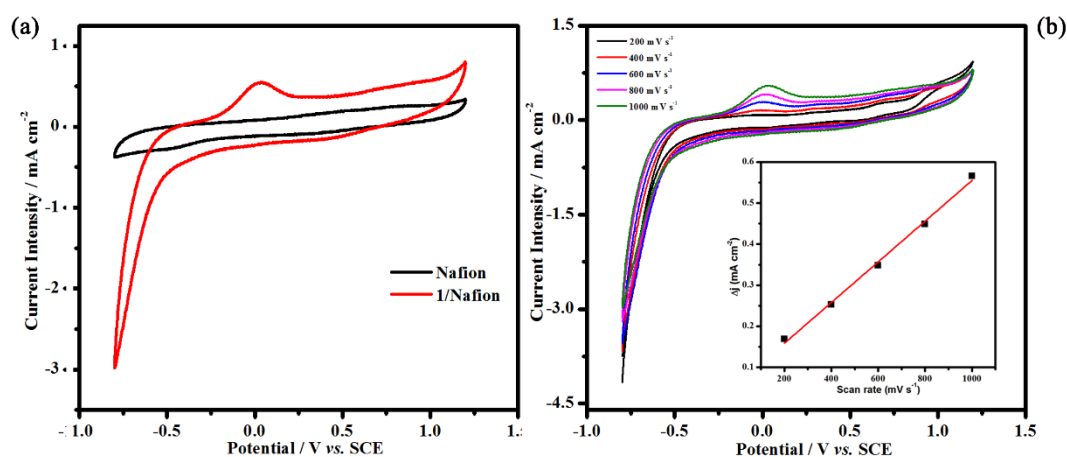

**Fig. S8.** (a) CV of Nafion (black) and **1**/Nafion composites with scanning rate of  $1000 \text{ mV s}^{-1}$ ; (b) The typical CV of **1**/Nafion composites with different scanning rate and the relationship between scanning rate and peak current intensity (insert).

Comparing with Nafion, the CV curves of **1**/Nafion composites presented two obviously different: high current intensity and special oxidation-reduction peaks (shown in Fig. S8a). The high current intensity suggested that incorporating of **1** can obviously improve the proton conduction behavior of the membrane. **1**/Nafion composites showed a couple of oxidation-reduction peaks near 0.03 V and 0.40 V respectively. This result indicated that **1** was involved in proton transfer process and the oxidation-reduction peaks were attributed to the proton migration between **1** and solvent. The relation between scanning rate and peak current intensity was shown in Fig. S8b. According to Fig. S8b† insert, peak current intensity was in direct proportion to square of scanning rate, which indicated that the diffusion process decided the reaction rate. In other word, the proton transfer process in the composite was faster than the diffusion process.

**Table S1** Bond lengths [Å] for **1**

|              |            |               |          |               |           |
|--------------|------------|---------------|----------|---------------|-----------|
| V(1)-O(11)   | 1.636(4)   | V(6)-O(21)    | 2.002(3) | O(19)-B(7)    | 1.484(6)  |
| V(1)-O(22)   | 1.929(3)   | Na(2)-O(1)    | 2.269(4) | O(19)-V(2)#1  | 1.952(4)  |
| V(1)-O(20)   | 1.936(4)   | Na(2)-O(15)#3 | 2.459(4) | O(19)-Na(2)#3 | 2.709(4)  |
| V(1)-O(2)    | 1.939(4)   | Na(2)-O(6)#3  | 2.492(5) | O(20)-B(3)    | 1.485(7)  |
| V(1)-O(17)#1 | 1.950(3)   | Na(2)-O(1W)   | 2.610(7) | O(21)-B(7)    | 1.503(6)  |
| V(1)-V(6)    | 2.9979(12) | Na(2)-O(15)   | 2.642(5) | O(21)-B(9)    | 1.524(6)  |
| V(1)-V(5)#1  | 2.9992(12) | Na(2)-O(19)#3 | 2.709(4) | O(22)-V(5)#1  | 1.946(3)  |
| V(2)-O(10)   | 1.634(4)   | Na(2)-O(10)#4 | 2.925(5) | O(23)-B(4)    | 1.357(7)  |
| V(2)-O(29)   | 1.933(4)   | Na(2)-B(7)    | 3.022(6) | O(23)-B(9)    | 1.478(7)  |
| V(2)-O(22)   | 1.939(3)   | Na(2)-B(7)#3  | 3.034(6) | O(24)-B(5)    | 1.468(7)  |
| V(2)-O(19)#1 | 1.952(4)   | Na(2)-V(5)#3  | 3.219(3) | O(25)-B(8)    | 1.471(7)  |
| V(2)-O(27)#1 | 1.954(3)   | Na(2)-V(2)#4  | 3.517(3) | O(25)-V(4)#1  | 1.941(4)  |
| V(2)-V(4)#1  | 3.0011(12) | Na(2)-Na(2)#3 | 3.634(6) | O(26)-B(3)    | 1.431(7)  |
| V(2)-V(5)#1  | 3.0078(12) | O(1)-B(5)     | 1.420(7) | O(26)-B(9)    | 1.434(7)  |
| V(2)-Na(2)#2 | 3.517(3)   | O(1)-B(7)     | 1.432(7) | O(27)-B(9)    | 1.489(6)  |
| V(3)-O(9)    | 1.632(4)   | O(1W)-Na(1)   | 2.402(7) | O(27)-V(2)#1  | 1.954(3)  |
| V(3)-O(29)   | 1.934(4)   | O(2W)-Na(1)   | 2.326(8) | O(28)-B(3)#1  | 1.513(6)  |
| V(3)-O(25)   | 1.938(3)   | O(3)-B(2)     | 1.389(7) | O(28)-B(6)    | 1.517(7)  |
| V(3)-O(24)   | 1.941(4)   | O(3)-Na(1)#5  | 2.566(6) | O(28)-V(4)#1  | 2.000(3)  |
| V(3)-O(2)    | 1.942(3)   | O(4)-B(4)     | 1.383(7) | O(29)-V(4)#1  | 1.946(4)  |
| V(3)-V(4)#1  | 3.0052(12) | O(6)-Na(2)#3  | 2.492(5) | O(30)-B(5)    | 1.521(6)  |
| V(3)-V(6)    | 3.0157(12) | O(7)-B(1)     | 1.367(7) | O(30)-B(8)    | 1.528(6)  |
| V(4)-O(5)    | 1.628(4)   | O(8)-Na(1)    | 2.454(5) | Na(1)-O(9)#5  | 2.525(5)  |
| V(4)-O(27)   | 1.928(4)   | O(9)-Na(1)#5  | 2.525(5) | Na(1)-O(3)#5  | 2.566(6)  |
| V(4)-O(25)#1 | 1.941(4)   | O(10)-Na(2)#2 | 2.925(5) | Na(1)-B(2)#5  | 3.054(7)  |
| V(4)-O(29)#1 | 1.946(4)   | O(12)-B(1)    | 1.362(7) | B(2)-Na(1)#5  | 3.054(7)  |
| V(4)-O(28)#1 | 2.000(3)   | O(12)-B(3)    | 1.483(7) | B(3)-O(28)#1  | 1.513(6)  |
| V(4)-V(2)#1  | 3.0011(12) | O(13)-B(2)    | 1.368(7) | B(6)-O(18)#1  | 1.472(6)  |
| V(4)-V(3)#1  | 3.0052(12) | O(13)-B(5)    | 1.483(6) | B(7)-Na(2)#3  | 3.034(6)  |
| V(5)-O(6)    | 1.627(4)   | O(14)-B(2)    | 1.347(7) | C(1)-N(1)     | 1.454(10) |
| V(5)-O(17)   | 1.932(3)   | O(14)-B(8)    | 1.469(6) | C(1)-C(2)     | 1.532(9)  |
| V(5)-O(19)   | 1.937(3)   | O(15)-B(4)    | 1.363(7) | C(1A)-C(2)    | 1.290(14) |
| V(5)-O(22)#1 | 1.946(4)   | O(15)-B(7)    | 1.492(6) | C(1A)-N(1A)   | 1.447(10) |
| V(5)-O(30)   | 2.014(3)   | O(15)-Na(2)#3 | 2.459(4) | C(2)-N(2)     | 1.476(12) |
| V(5)-V(1)#1  | 2.9992(12) | O(16)-B(8)    | 1.432(6) | C(3)-N(3A)    | 1.424(18) |
| V(5)-V(2)#1  | 3.0078(12) | O(16)-B(6)    | 1.434(6) | C(3)-N(3)     | 1.446(19) |
| V(5)-Na(2)#3 | 3.219(3)   | O(17)-B(6)    | 1.475(7) | C(3)-C(4)     | 1.525(12) |
| V(6)-O(8)    | 1.628(4)   | O(17)-V(1)#1  | 1.950(3) | C(4)-N(4)     | 1.457(10) |
| V(6)-O(24)   | 1.926(3)   | O(18)-B(1)    | 1.365(7) | N(1)-N(1)#6   | 1.80(8)   |
| V(6)-O(20)   | 1.928(4)   | O(18)-B(6)#1  | 1.472(6) | N(1A)-N(1A)#6 | 1.43(3)   |
| V(6)-O(2)    | 1.960(4)   |               |          |               |           |

**Table S2** Bond angles [deg] for **1**

|                      |            |                       |            |
|----------------------|------------|-----------------------|------------|
| O(11)-V(1)-O(22)     | 110.08(18) | O(6)#3-Na(2)-V(5)#3   | 29.79(9)   |
| O(11)-V(1)-O(20)     | 107.07(18) | O(1W)-Na(2)-V(5)#3    | 118.54(15) |
| O(22)-V(1)-O(20)     | 142.80(16) | O(15)-Na(2)-V(5)#3    | 92.31(12)  |
| O(11)-V(1)-O(2)      | 106.11(18) | O(19)#3-Na(2)-V(5)#3  | 36.90(8)   |
| O(22)-V(1)-O(2)      | 92.48(15)  | O(10)#4-Na(2)-V(5)#3  | 76.62(10)  |
| O(20)-V(1)-O(2)      | 78.89(15)  | B(7)-Na(2)-V(5)#3     | 121.69(15) |
| O(11)-V(1)-O(17)#1   | 108.43(18) | B(7)#3-Na(2)-V(5)#3   | 59.84(12)  |
| O(22)-V(1)-O(17)#1   | 78.52(15)  | O(1)-Na(2)-V(2)#4     | 155.09(15) |
| O(20)-V(1)-O(17)#1   | 88.27(15)  | O(15)#3-Na(2)-V(2)#4  | 70.59(10)  |
| O(2)-V(1)-O(17)#1    | 145.33(15) | O(6)#3-Na(2)-V(2)#4   | 77.54(10)  |
| O(11)-V(1)-V(6)      | 109.14(14) | O(1W)-Na(2)-V(2)#4    | 103.57(16) |
| O(22)-V(1)-V(6)      | 125.08(11) | O(15)-Na(2)-V(2)#4    | 138.41(13) |
| O(20)-V(1)-V(6)      | 39.03(10)  | O(19)#3-Na(2)-V(2)#4  | 33.44(8)   |
| O(2)-V(1)-V(6)       | 40.00(11)  | O(10)#4-Na(2)-V(2)#4  | 27.46(8)   |
| O(17)#1-V(1)-V(6)    | 122.05(11) | B(7)-Na(2)-V(2)#4     | 161.86(15) |
| O(11)-V(1)-V(5)#1    | 112.39(14) | B(7)#3-Na(2)-V(2)#4   | 55.63(12)  |
| O(22)-V(1)-V(5)#1    | 39.51(10)  | V(5)#3-Na(2)-V(2)#4   | 52.81(4)   |
| O(20)-V(1)-V(5)#1    | 121.37(11) | O(1)-Na(2)-Na(2)#3    | 68.49(12)  |
| O(2)-V(1)-V(5)#1     | 125.97(11) | O(15)#3-Na(2)-Na(2)#3 | 46.63(11)  |
| O(17)#1-V(1)-V(5)#1  | 39.18(10)  | O(6)#3-Na(2)-Na(2)#3  | 98.71(16)  |
| V(6)-V(1)-V(5)#1     | 138.35(4)  | O(1W)-Na(2)-Na(2)#3   | 145.64(18) |
| O(10)-V(2)-O(29)     | 110.87(19) | O(15)-Na(2)-Na(2)#3   | 42.59(10)  |
| O(10)-V(2)-O(22)     | 106.10(18) | O(19)#3-Na(2)-Na(2)#3 | 78.96(12)  |
| O(29)-V(2)-O(22)     | 92.94(15)  | O(10)#4-Na(2)-Na(2)#3 | 127.17(14) |
| O(10)-V(2)-O(19)#1   | 104.45(19) | B(7)-Na(2)-Na(2)#3    | 53.29(13)  |
| O(29)-V(2)-O(19)#1   | 144.65(16) | B(7)#3-Na(2)-Na(2)#3  | 52.97(13)  |
| O(22)-V(2)-O(19)#1   | 78.32(14)  | V(5)#3-Na(2)-Na(2)#3  | 90.99(11)  |
| O(10)-V(2)-O(27)#1   | 109.06(19) | V(2)#4-Na(2)-Na(2)#3  | 108.59(10) |
| O(29)-V(2)-O(27)#1   | 78.48(15)  | B(5)-O(1)-B(7)        | 119.5(4)   |
| O(22)-V(2)-O(27)#1   | 144.60(16) | B(5)-O(1)-Na(2)       | 132.9(3)   |
| O(19)#1-V(2)-O(27)#1 | 89.02(15)  | B(7)-O(1)-Na(2)       | 107.3(3)   |
| O(10)-V(2)-V(4)#1    | 114.39(15) | Na(1)-O(1W)-Na(2)     | 112.2(3)   |
| O(29)-V(2)-V(4)#1    | 39.49(11)  | V(1)-O(2)-V(3)        | 144.4(2)   |
| O(22)-V(2)-V(4)#1    | 125.36(11) | V(1)-O(2)-V(6)        | 100.52(16) |
| O(19)#1-V(2)-V(4)#1  | 121.98(11) | V(3)-O(2)-V(6)        | 101.22(16) |
| O(27)#1-V(2)-V(4)#1  | 39.06(10)  | B(2)-O(3)-Na(1)#5     | 96.6(4)    |
| O(10)-V(2)-V(5)#1    | 106.81(15) | V(5)-O(6)-Na(2)#3     | 100.66(19) |
| O(29)-V(2)-V(5)#1    | 126.12(12) | V(6)-O(8)-Na(1)       | 136.6(2)   |
| O(22)-V(2)-V(5)#1    | 39.36(10)  | V(3)-O(9)-Na(1)#5     | 131.4(2)   |
| O(19)#1-V(2)-V(5)#1  | 39.16(10)  | V(2)-O(10)-Na(2)#2    | 96.91(19)  |
| O(27)#1-V(2)-V(5)#1  | 122.81(11) | B(1)-O(12)-B(3)       | 122.9(4)   |
| V(4)#1-V(2)-V(5)#1   | 138.66(4)  | B(2)-O(13)-B(5)       | 121.4(4)   |
| O(10)-V(2)-Na(2)#2   | 55.64(16)  | B(2)-O(14)-B(8)       | 121.5(4)   |

|                      |            |                      |            |
|----------------------|------------|----------------------|------------|
| O(29)-V(2)-Na(2)#2   | 164.12(12) | B(4)-O(15)-B(7)      | 120.8(4)   |
| O(22)-V(2)-Na(2)#2   | 84.07(11)  | B(4)-O(15)-Na(2)#3   | 116.4(3)   |
| O(19)#1-V(2)-Na(2)#2 | 49.90(12)  | B(7)-O(15)-Na(2)#3   | 97.3(3)    |
| O(27)#1-V(2)-Na(2)#2 | 112.65(12) | B(4)-O(15)-Na(2)     | 133.4(3)   |
| V(4)#1-V(2)-Na(2)#2  | 149.50(5)  | B(7)-O(15)-Na(2)     | 89.5(3)    |
| V(5)#1-V(2)-Na(2)#2  | 58.49(5)   | Na(2)#3-O(15)-Na(2)  | 90.79(15)  |
| O(9)-V(3)-O(29)      | 109.03(19) | B(8)-O(16)-B(6)      | 120.5(4)   |
| O(9)-V(3)-O(25)      | 106.26(19) | B(6)-O(17)-V(5)      | 130.1(3)   |
| O(29)-V(3)-O(25)     | 78.49(15)  | B(6)-O(17)-V(1)#1    | 128.7(3)   |
| O(9)-V(3)-O(24)      | 107.86(19) | V(5)-O(17)-V(1)#1    | 101.19(16) |
| O(29)-V(3)-O(24)     | 142.90(16) | B(1)-O(18)-B(6)#1    | 120.7(4)   |
| O(25)-V(3)-O(24)     | 87.72(15)  | B(7)-O(19)-V(5)      | 131.3(3)   |
| O(9)-V(3)-O(2)       | 108.28(19) | B(7)-O(19)-V(2)#1    | 127.4(3)   |
| O(29)-V(3)-O(2)      | 94.08(15)  | V(5)-O(19)-V(2)#1    | 101.34(16) |
| O(25)-V(3)-O(2)      | 145.20(16) | B(7)-O(19)-Na(2)#3   | 87.6(3)    |
| O(24)-V(3)-O(2)      | 77.92(15)  | V(5)-O(19)-Na(2)#3   | 86.00(14)  |
| O(9)-V(3)-V(4)#1     | 110.29(15) | V(2)#1-O(19)-Na(2)#3 | 96.66(16)  |
| O(29)-V(3)-V(4)#1    | 39.40(11)  | B(3)-O(20)-V(6)      | 131.2(3)   |
| O(25)-V(3)-V(4)#1    | 39.25(11)  | B(3)-O(20)-V(1)      | 127.0(3)   |
| O(24)-V(3)-V(4)#1    | 121.01(11) | V(6)-O(20)-V(1)      | 101.77(16) |
| O(2)-V(3)-V(4)#1     | 127.09(11) | B(7)-O(21)-B(9)      | 114.8(4)   |
| O(9)-V(3)-V(6)       | 110.02(15) | B(7)-O(21)-V(6)      | 120.5(3)   |
| O(29)-V(3)-V(6)      | 126.79(11) | B(9)-O(21)-V(6)      | 121.9(3)   |
| O(25)-V(3)-V(6)      | 121.84(11) | V(1)-O(22)-V(2)      | 147.0(2)   |
| O(24)-V(3)-V(6)      | 38.58(10)  | V(1)-O(22)-V(5)#1    | 101.40(16) |
| O(2)-V(3)-V(6)       | 39.61(11)  | V(2)-O(22)-V(5)#1    | 101.46(16) |
| V(4)#1-V(3)-V(6)     | 139.39(4)  | B(4)-O(23)-B(9)      | 122.2(4)   |
| O(5)-V(4)-O(27)      | 109.21(19) | B(5)-O(24)-V(6)      | 129.4(3)   |
| O(5)-V(4)-O(25)#1    | 110.31(19) | B(5)-O(24)-V(3)      | 127.1(3)   |
| O(27)-V(4)-O(25)#1   | 138.46(16) | V(6)-O(24)-V(3)      | 102.50(16) |
| O(5)-V(4)-O(29)#1    | 106.77(19) | B(8)-O(25)-V(3)      | 126.8(3)   |
| O(27)-V(4)-O(29)#1   | 78.79(15)  | B(8)-O(25)-V(4)#1    | 131.4(3)   |
| O(25)#1-V(4)-O(29)#1 | 78.13(15)  | V(3)-O(25)-V(4)#1    | 101.56(16) |
| O(5)-V(4)-O(28)#1    | 107.47(18) | B(3)-O(26)-B(9)      | 119.9(4)   |
| O(27)-V(4)-O(28)#1   | 91.06(15)  | B(9)-O(27)-V(4)      | 130.5(3)   |
| O(25)#1-V(4)-O(28)#1 | 89.02(14)  | B(9)-O(27)-V(2)#1    | 128.2(3)   |
| O(29)#1-V(4)-O(28)#1 | 145.74(15) | V(4)-O(27)-V(2)#1    | 101.25(16) |
| O(5)-V(4)-V(2)#1     | 111.77(16) | B(3)#1-O(28)-B(6)    | 113.7(4)   |
| O(27)-V(4)-V(2)#1    | 39.69(10)  | B(3)#1-O(28)-V(4)#1  | 120.9(3)   |
| O(25)#1-V(4)-V(2)#1  | 111.40(11) | B(6)-O(28)-V(4)#1    | 122.4(3)   |
| O(29)#1-V(4)-V(2)#1  | 39.17(11)  | V(2)-O(29)-V(3)      | 144.3(2)   |
| O(28)#1-V(4)-V(2)#1  | 124.48(10) | V(2)-O(29)-V(4)#1    | 101.34(16) |
| O(5)-V(4)-V(3)#1     | 111.43(15) | V(3)-O(29)-V(4)#1    | 101.50(16) |
| O(27)-V(4)-V(3)#1    | 112.49(11) | B(5)-O(30)-B(8)      | 113.1(4)   |

|                      |            |                     |            |
|----------------------|------------|---------------------|------------|
| O(25)#1-V(4)-V(3)#1  | 39.18(10)  | B(5)-O(30)-V(5)     | 120.7(3)   |
| O(29)#1-V(4)-V(3)#1  | 39.10(11)  | B(8)-O(30)-V(5)     | 121.0(3)   |
| O(28)#1-V(4)-V(3)#1  | 123.11(10) | O(2W)-Na(1)-O(1W)   | 98.3(2)    |
| V(2)#1-V(4)-V(3)#1   | 75.60(3)   | O(2W)-Na(1)-O(8)    | 106.1(2)   |
| O(6)-V(5)-O(17)      | 111.43(18) | O(1W)-Na(1)-O(8)    | 98.3(2)    |
| O(6)-V(5)-O(19)      | 106.55(19) | O(2W)-Na(1)-O(9)#5  | 88.2(2)    |
| O(17)-V(5)-O(19)     | 139.77(16) | O(1W)-Na(1)-O(9)#5  | 86.5(2)    |
| O(6)-V(5)-O(22)#1    | 106.53(18) | O(8)-Na(1)-O(9)#5   | 164.0(2)   |
| O(17)-V(5)-O(22)#1   | 78.55(14)  | O(2W)-Na(1)-O(3)#5  | 98.0(2)    |
| O(19)-V(5)-O(22)#1   | 78.49(14)  | O(1W)-Na(1)-O(3)#5  | 162.5(2)   |
| O(6)-V(5)-O(30)      | 106.56(18) | O(8)-Na(1)-O(3)#5   | 83.25(17)  |
| O(17)-V(5)-O(30)     | 91.25(14)  | O(9)#5-Na(1)-O(3)#5 | 87.62(17)  |
| O(19)-V(5)-O(30)     | 90.28(14)  | O(2W)-Na(1)-B(2)#5  | 115.4(2)   |
| O(22)#1-V(5)-O(30)   | 146.85(15) | O(1W)-Na(1)-B(2)#5  | 136.8(2)   |
| O(6)-V(5)-V(1)#1     | 111.99(14) | O(8)-Na(1)-B(2)#5   | 97.55(18)  |
| O(17)-V(5)-V(1)#1    | 39.63(10)  | O(9)#5-Na(1)-B(2)#5 | 69.14(17)  |
| O(19)-V(5)-V(1)#1    | 112.75(11) | O(3)#5-Na(1)-B(2)#5 | 26.86(15)  |
| O(22)#1-V(5)-V(1)#1  | 39.09(10)  | O(2W)-Na(1)-Na(2)   | 65.02(17)  |
| O(30)-V(5)-V(1)#1    | 125.67(10) | O(1W)-Na(1)-Na(2)   | 35.50(16)  |
| O(6)-V(5)-V(2)#1     | 108.51(15) | O(8)-Na(1)-Na(2)    | 95.32(13)  |
| O(17)-V(5)-V(2)#1    | 113.00(11) | O(9)#5-Na(1)-Na(2)  | 97.39(14)  |
| O(19)-V(5)-V(2)#1    | 39.51(10)  | O(3)#5-Na(1)-Na(2)  | 161.97(18) |
| O(22)#1-V(5)-V(2)#1  | 39.18(10)  | B(2)#5-Na(1)-Na(2)  | 166.29(16) |
| O(30)-V(5)-V(2)#1    | 124.93(10) | O(12)-B(1)-O(18)    | 121.7(5)   |
| V(1)#1-V(5)-V(2)#1   | 76.26(3)   | O(12)-B(1)-O(7)     | 120.8(5)   |
| O(6)-V(5)-Na(2)#3    | 49.55(15)  | O(18)-B(1)-O(7)     | 117.4(5)   |
| O(17)-V(5)-Na(2)#3   | 156.12(12) | O(14)-B(2)-O(13)    | 122.6(5)   |
| O(19)-V(5)-Na(2)#3   | 57.10(12)  | O(14)-B(2)-O(3)     | 121.5(5)   |
| O(22)#1-V(5)-Na(2)#3 | 92.63(12)  | O(13)-B(2)-O(3)     | 115.7(5)   |
| O(30)-V(5)-Na(2)#3   | 107.33(11) | O(14)-B(2)-Na(1)#5  | 132.4(4)   |
| V(1)#1-V(5)-Na(2)#3  | 126.70(6)  | O(13)-B(2)-Na(1)#5  | 77.6(3)    |
| V(2)#1-V(5)-Na(2)#3  | 68.70(6)   | O(3)-B(2)-Na(1)#5   | 56.6(3)    |
| O(8)-V(6)-O(24)      | 111.76(18) | O(26)-B(3)-O(12)    | 107.5(4)   |
| O(8)-V(6)-O(20)      | 110.87(18) | O(26)-B(3)-O(20)    | 109.9(4)   |
| O(24)-V(6)-O(20)     | 135.55(16) | O(12)-B(3)-O(20)    | 108.7(4)   |
| O(8)-V(6)-O(2)       | 106.74(18) | O(26)-B(3)-O(28)#1  | 113.9(4)   |
| O(24)-V(6)-O(2)      | 77.84(15)  | O(12)-B(3)-O(28)#1  | 108.5(4)   |
| O(20)-V(6)-O(2)      | 78.55(15)  | O(20)-B(3)-O(28)#1  | 108.4(4)   |
| O(8)-V(6)-O(21)      | 106.51(18) | O(23)-B(4)-O(15)    | 123.2(5)   |
| O(24)-V(6)-O(21)     | 89.75(15)  | O(23)-B(4)-O(4)     | 116.4(5)   |
| O(20)-V(6)-O(21)     | 89.87(15)  | O(15)-B(4)-O(4)     | 120.4(5)   |
| O(2)-V(6)-O(21)      | 146.75(15) | O(1)-B(5)-O(24)     | 110.7(4)   |
| O(8)-V(6)-V(1)       | 112.06(14) | O(1)-B(5)-O(13)     | 107.9(4)   |
| O(24)-V(6)-V(1)      | 110.68(11) | O(24)-B(5)-O(13)    | 108.9(4)   |



|                       |            |                    |           |
|-----------------------|------------|--------------------|-----------|
| O(20)-V(6)-V(1)       | 39.21(11)  | O(1)-B(5)-O(30)    | 113.0(4)  |
| O(2)-V(6)-V(1)        | 39.48(10)  | O(24)-B(5)-O(30)   | 107.5(4)  |
| O(21)-V(6)-V(1)       | 124.03(10) | O(13)-B(5)-O(30)   | 108.7(4)  |
| O(8)-V(6)-V(3)        | 111.58(15) | O(16)-B(6)-O(18)#1 | 106.4(4)  |
| O(24)-V(6)-V(3)       | 38.92(11)  | O(16)-B(6)-O(17)   | 111.1(4)  |
| O(20)-V(6)-V(3)       | 111.64(11) | O(18)#1-B(6)-O(17) | 110.0(4)  |
| O(2)-V(6)-V(3)        | 39.18(10)  | O(16)-B(6)-O(28)   | 112.6(4)  |
| O(21)-V(6)-V(3)       | 124.30(10) | O(18)#1-B(6)-O(28) | 109.5(4)  |
| V(1)-V(6)-V(3)        | 75.81(3)   | O(17)-B(6)-O(28)   | 107.3(4)  |
| O(1)-Na(2)-O(15)#3    | 93.03(15)  | O(1)-B(7)-O(19)    | 110.0(4)  |
| O(1)-Na(2)-O(6)#3     | 127.21(18) | O(1)-B(7)-O(15)    | 106.5(4)  |
| O(15)#3-Na(2)-O(6)#3  | 115.17(16) | O(19)-B(7)-O(15)   | 108.8(4)  |
| O(1)-Na(2)-O(1W)      | 77.26(17)  | O(1)-B(7)-O(21)    | 113.7(4)  |
| O(15)#3-Na(2)-O(1W)   | 141.5(2)   | O(19)-B(7)-O(21)   | 108.3(4)  |
| O(6)#3-Na(2)-O(1W)    | 99.71(18)  | O(15)-B(7)-O(21)   | 109.4(4)  |
| O(1)-Na(2)-O(15)      | 56.40(14)  | O(1)-B(7)-Na(2)    | 45.8(2)   |
| O(15)#3-Na(2)-O(15)   | 89.21(15)  | O(19)-B(7)-Na(2)   | 127.3(3)  |
| O(6)#3-Na(2)-O(15)    | 79.19(15)  | O(15)-B(7)-Na(2)   | 61.0(2)   |
| O(1W)-Na(2)-O(15)     | 114.04(18) | O(21)-B(7)-Na(2)   | 124.1(3)  |
| O(1)-Na(2)-O(19)#3    | 145.82(17) | O(1)-B(7)-Na(2)#3  | 96.9(3)   |
| O(15)#3-Na(2)-O(19)#3 | 55.60(12)  | O(19)-B(7)-Na(2)#3 | 63.1(2)   |
| O(6)#3-Na(2)-O(19)#3  | 66.64(13)  | O(15)-B(7)-Na(2)#3 | 53.5(2)   |
| O(1W)-Na(2)-O(19)#3   | 135.17(19) | O(21)-B(7)-Na(2)#3 | 148.9(3)  |
| O(15)-Na(2)-O(19)#3   | 105.23(15) | Na(2)-B(7)-Na(2)#3 | 73.75(16) |
| O(1)-Na(2)-O(10)#4    | 134.69(17) | O(16)-B(8)-O(14)   | 108.5(4)  |
| O(15)#3-Na(2)-O(10)#4 | 81.51(14)  | O(16)-B(8)-O(25)   | 109.6(4)  |
| O(6)#3-Na(2)-O(10)#4  | 94.76(14)  | O(14)-B(8)-O(25)   | 109.5(4)  |
| O(1W)-Na(2)-O(10)#4   | 79.73(18)  | O(16)-B(8)-O(30)   | 112.0(4)  |
| O(15)-Na(2)-O(10)#4   | 165.60(16) | O(14)-B(8)-O(30)   | 108.6(4)  |
| O(19)#3-Na(2)-O(10)#4 | 60.41(12)  | O(25)-B(8)-O(30)   | 108.6(4)  |
| O(1)-Na(2)-B(7)       | 26.89(14)  | O(26)-B(9)-O(23)   | 108.6(4)  |
| O(15)#3-Na(2)-B(7)    | 92.91(16)  | O(26)-B(9)-O(27)   | 110.2(4)  |
| O(6)#3-Na(2)-B(7)     | 104.06(17) | O(23)-B(9)-O(27)   | 109.6(4)  |
| O(1W)-Na(2)-B(7)      | 94.03(19)  | O(26)-B(9)-O(21)   | 113.0(4)  |
| O(15)-Na(2)-B(7)      | 29.58(13)  | O(23)-B(9)-O(21)   | 108.1(4)  |
| O(19)#3-Na(2)-B(7)    | 130.22(17) | O(27)-B(9)-O(21)   | 107.4(4)  |
| O(10)#4-Na(2)-B(7)    | 160.95(17) | N(1)-C(1)-C(2)     | 107.7(12) |
| O(1)-Na(2)-B(7)#3     | 116.69(17) | C(2)-C(1A)-N(1A)   | 125.7(13) |
| O(15)#3-Na(2)-B(7)#3  | 29.19(13)  | C(1A)-C(2)-N(2)    | 164.6(11) |
| O(6)#3-Na(2)-B(7)#3   | 86.53(16)  | C(1A)-C(2)-C(1)    | 57.9(8)   |
| O(1W)-Na(2)-B(7)#3    | 156.7(2)   | N(2)-C(2)-C(1)     | 112.2(9)  |
| O(15)-Na(2)-B(7)#3    | 89.10(16)  | N(3A)-C(3)-N(3)    | 108.0(12) |
| O(19)#3-Na(2)-B(7)#3  | 29.26(13)  | N(3A)-C(3)-C(4)    | 120.2(9)  |
| O(10)#4-Na(2)-B(7)#3  | 77.42(15)  | N(3)-C(3)-C(4)     | 121.6(10) |

|                      |            |                     |          |
|----------------------|------------|---------------------|----------|
| B(7)-Na(2)-B(7)#3    | 106.25(16) | N(4)-C(4)-C(3)      | 114.7(7) |
| O(1)-Na(2)-V(5)#3    | 148.57(16) | C(1)-N(1)-N(1)#6    | 116(3)   |
| O(15)#3-Na(2)-V(5)#3 | 88.98(11)  | N(1A)#6-N(1A)-C(1A) | 166(4)   |

Symmetry transformations used to generate equivalent atoms:

#1  $-x+1, -y+1, -z+1$     #2  $x, y-1, z$     #3  $-x+1, -y+2, -z+1$

#4  $x, y+1, z$     #5  $-x+2, -y+2, -z+1$     #6  $-x+1, -y, -z$
