# Supplementary figures and images for: Construction of a unique 2-D layered vanadoborate with water-assisted proton conductivity
Source: Royal Society of Chemistry journal article supplement (doi:10.1039/d2nj03124h), 2022-01-01

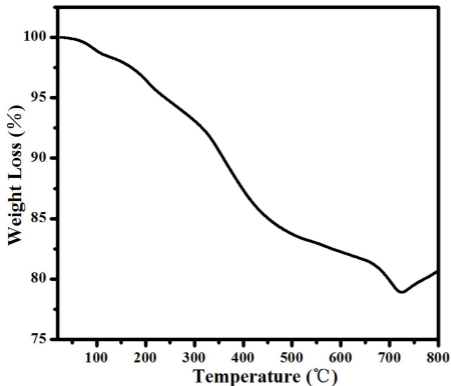

Supplement: d2nj03124h1.pdf [file d2nj03124h1.pdf]

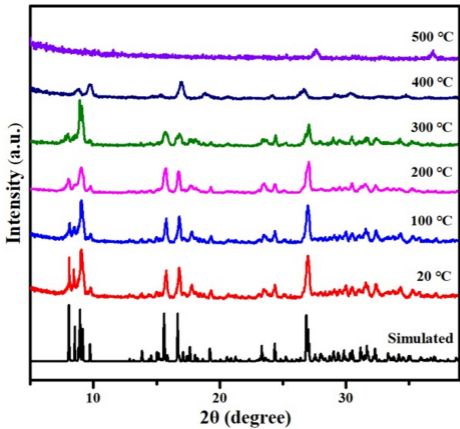

Supplement: d2nj03124h2.pdf [file d2nj03124h2.pdf]

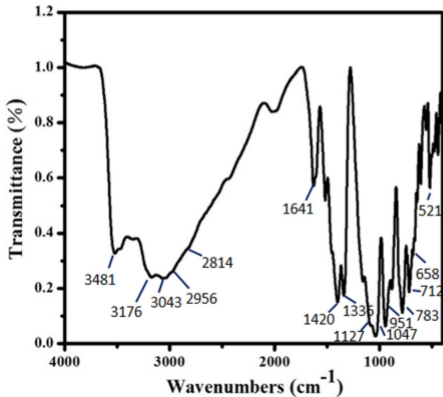

Supplement: d2nj03124h3.pdf [file d2nj03124h3.pdf]

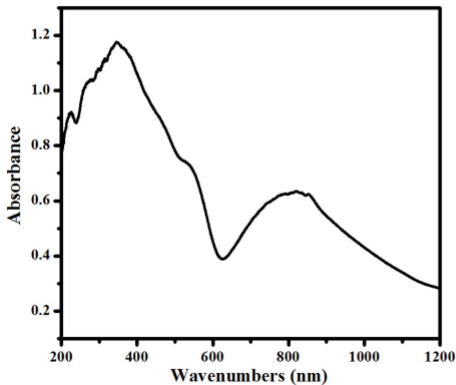

Supplement: d2nj03124h4.pdf [file d2nj03124h4.pdf]

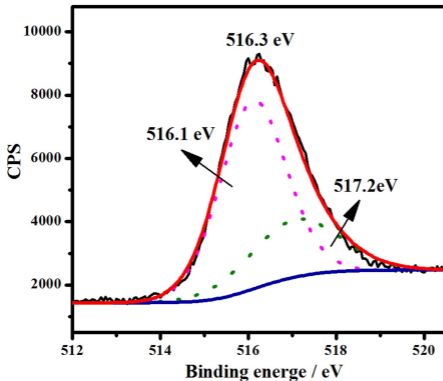

Supplement: d2nj03124h5.pdf [file d2nj03124h5.pdf]

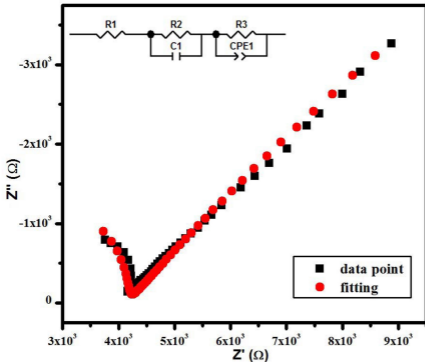

Supplement: d2nj03124h6.pdf [file d2nj03124h6.pdf]

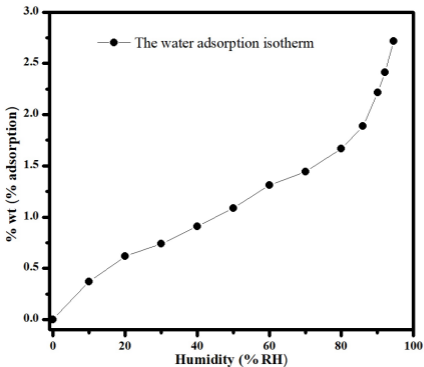

Supplement: d2nj03124h7.pdf [file d2nj03124h7.pdf]

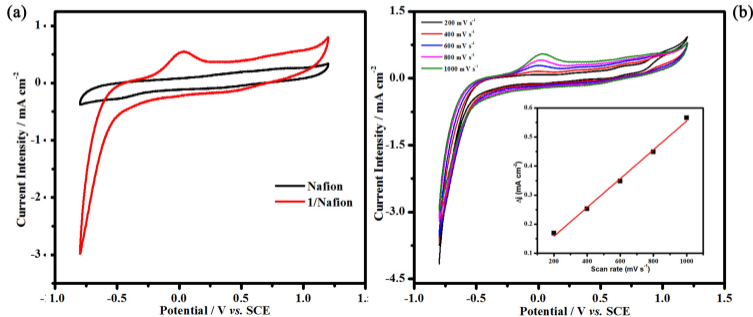

Supplement: d2nj03124h8.pdf [file d2nj03124h8.pdf]
